# Supplementary material for: Three-dimensional flexible electrode derived from low-cost nickel–phytate with improved electrochemical performance
Source: Royal Society of Chemistry journal article supplement (doi:10.1039/c6ta02732f), 2016-01-01
Supplement: c6ta02732f1.pdf [file c6ta02732f1.pdf]

## Supplementary Information

### Three-Dimensional Flexible Electrode Derived from Low-Cost Nickel-Phytate with Improved Electrochemical Performance

Panpan Li,<sup>a, b</sup> Zhaoyu Jin,<sup>b</sup> Rui Wang,<sup>c</sup> Yong Jin<sup>c, \*</sup>, Dan Xiao<sup>b, \*</sup>

**Table S1.** Composition and operating conditions of the coating baths for depositing nickel.

|                                                                        |         |
|------------------------------------------------------------------------|---------|
| <b>NiSO<sub>4</sub>·6H<sub>2</sub>O (g L<sup>-1</sup>)</b>             | 28      |
| <b>NaH<sub>2</sub>PO<sub>2</sub>·H<sub>2</sub>O (g L<sup>-1</sup>)</b> | 20      |
| <b>NaC<sub>2</sub>H<sub>3</sub>O<sub>2</sub> (g L<sup>-1</sup>)</b>    | 5       |
| <b>Tri-sodium citrate (g L<sup>-1</sup>)</b>                           | 5       |
| <b>pH</b>                                                              | 4 ~ 5   |
| <b>Temperature (°C)</b>                                                | 80 ~ 90 |

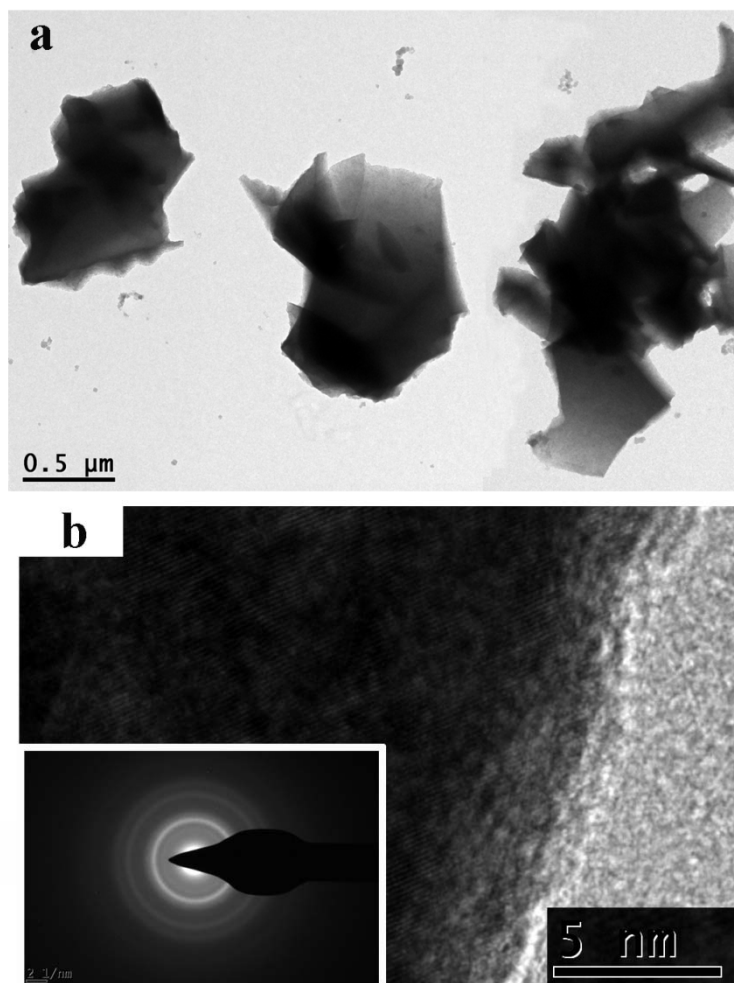

**Fig. S1** The TEM images of Ni-phytate nanoplates and the corresponding SAED in panel b.

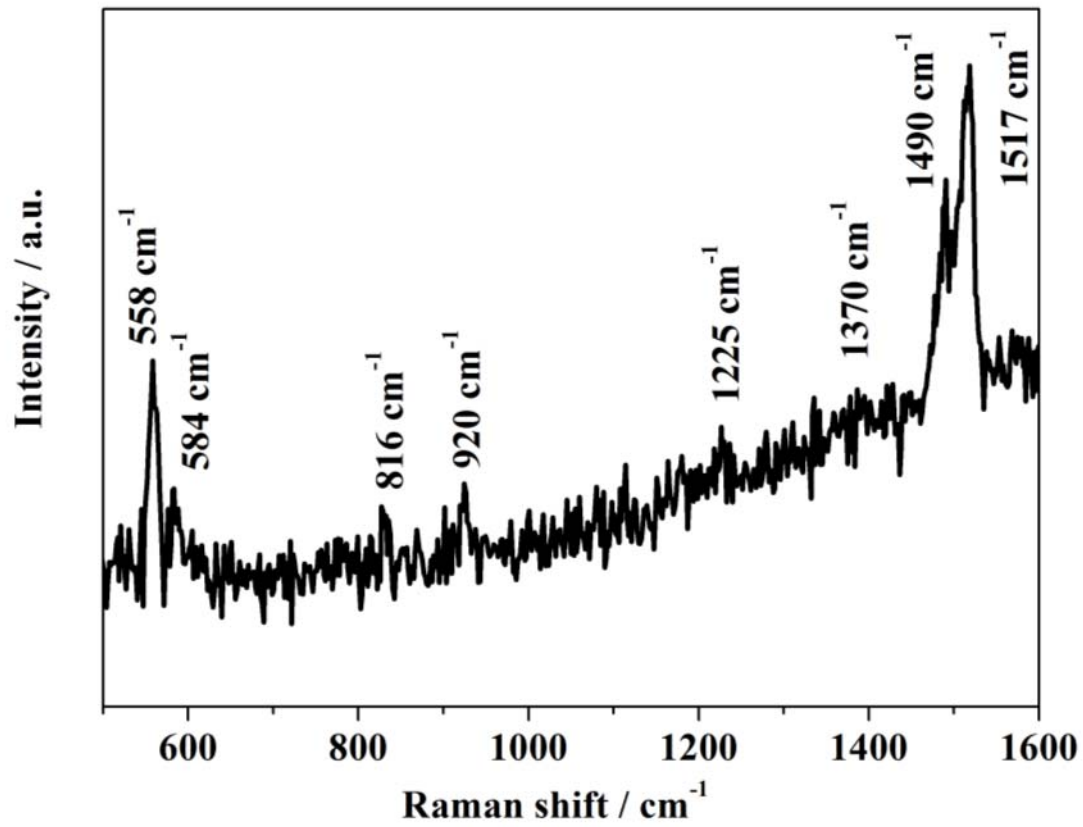

**Fig. S2** The Raman pattern of 3D-NA/Ni/NiNPs.

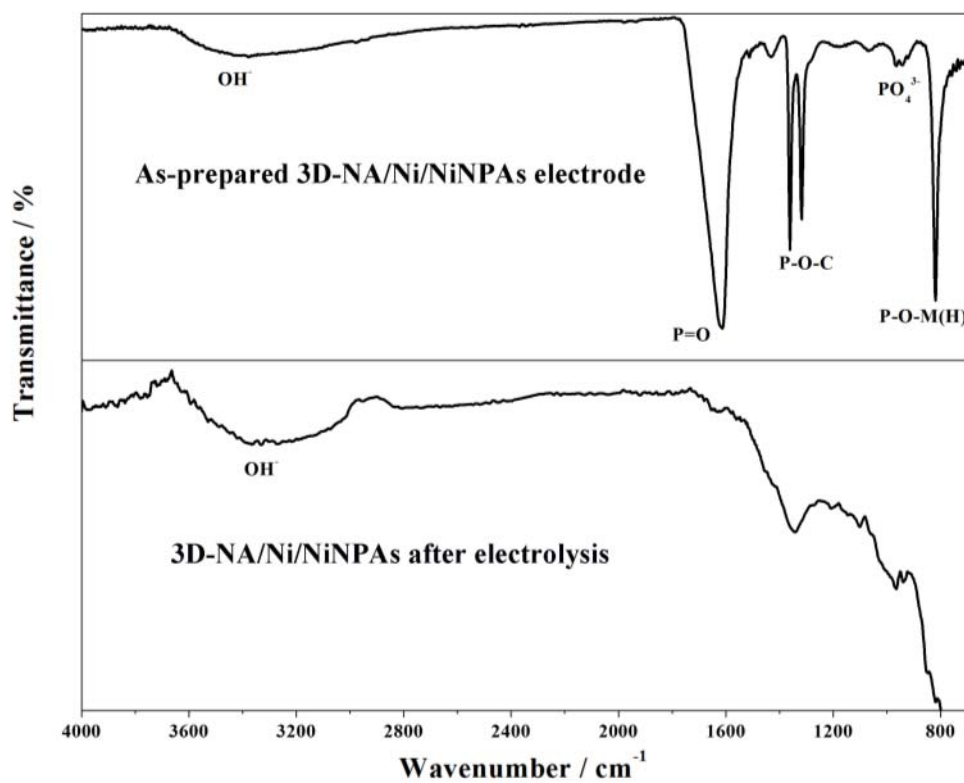

**Fig. S3** The ATR-IR spectra of 3D-NA/Ni/NiNPs before and after electrolysis.

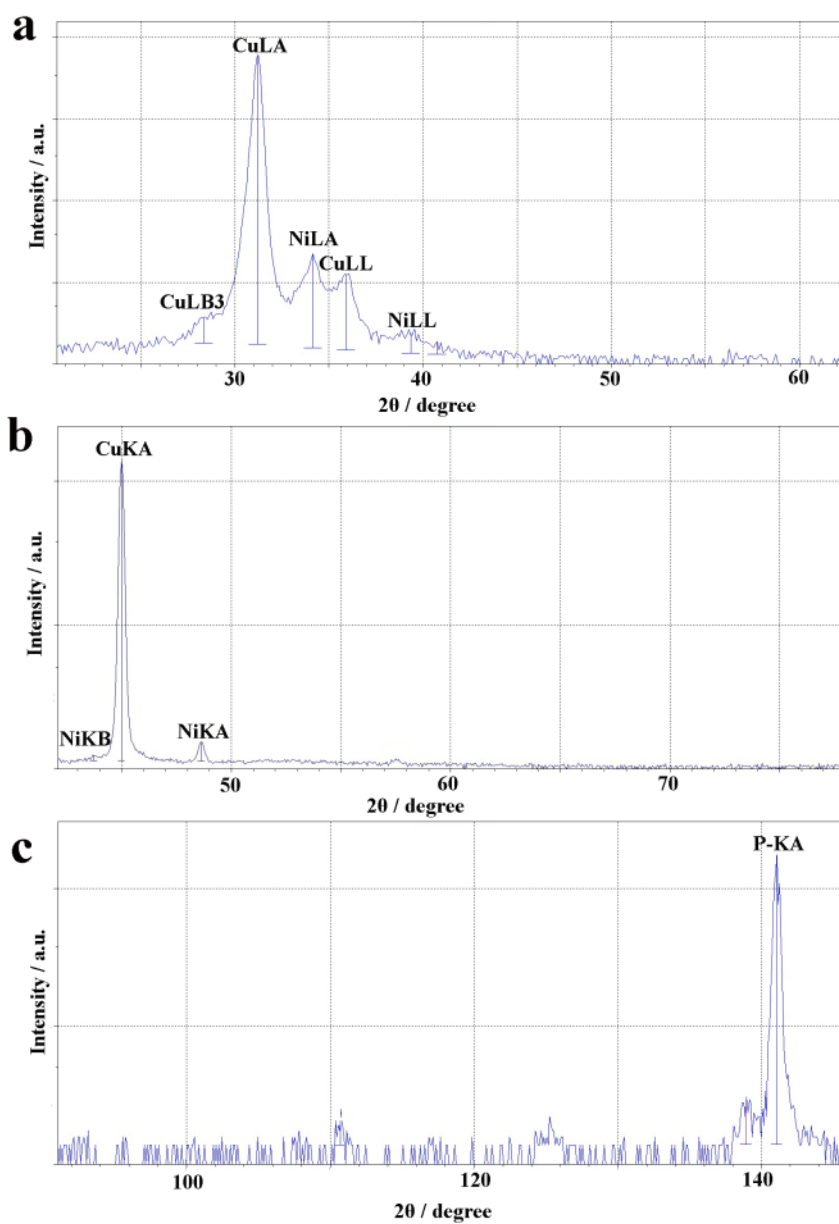

**Fig. S4** XRF spectra of PL/Ni substrate at different diffraction degrees.

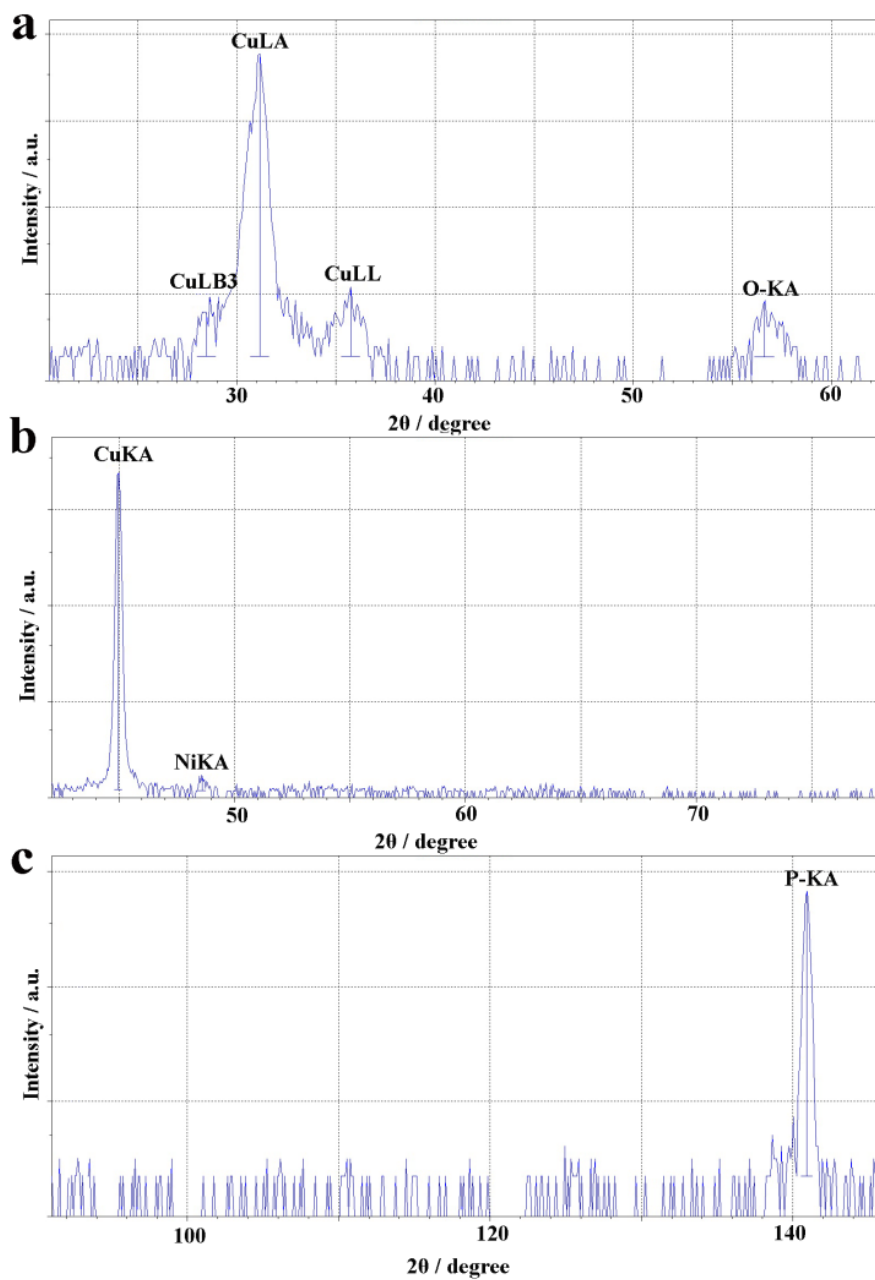

**Fig. S5** XRF spectra of PL/Ni/NiNPAs substrate at different diffraction degrees.

**Table S2.** The quantitative analysis of elements on the surface of PL-Ni and PL-NiNPsAs.

| <b>PL/Ni</b>         |                          | <b>PL/Ni/NiNPsAs</b> |              |
|----------------------|--------------------------|----------------------|--------------|
| <b>E<sup>a</sup></b> | <b>C<sup>b</sup> / %</b> | <b>E</b>             | <b>C / %</b> |
| P                    | 0.553                    | P                    | 1.053        |
| Ni                   | 17.543                   | Ni                   | 0.175        |
| Cu                   | 81.905                   | Cu                   | 60.959       |
| O                    | —                        | O                    | 37.813       |

<sup>a</sup>E: the abbreviation of elements. <sup>b</sup>C: the abbreviation of concentration.

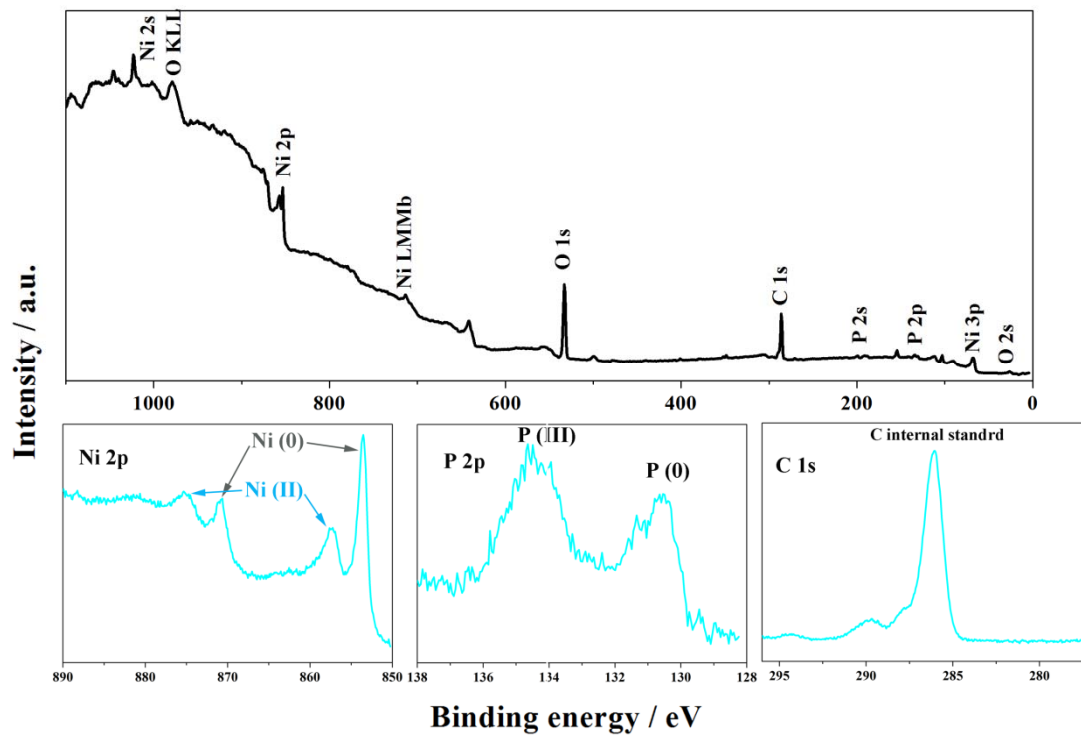

**Fig. S6** The survey scan XPS spectra and of 3D-NA/Ni substrate.



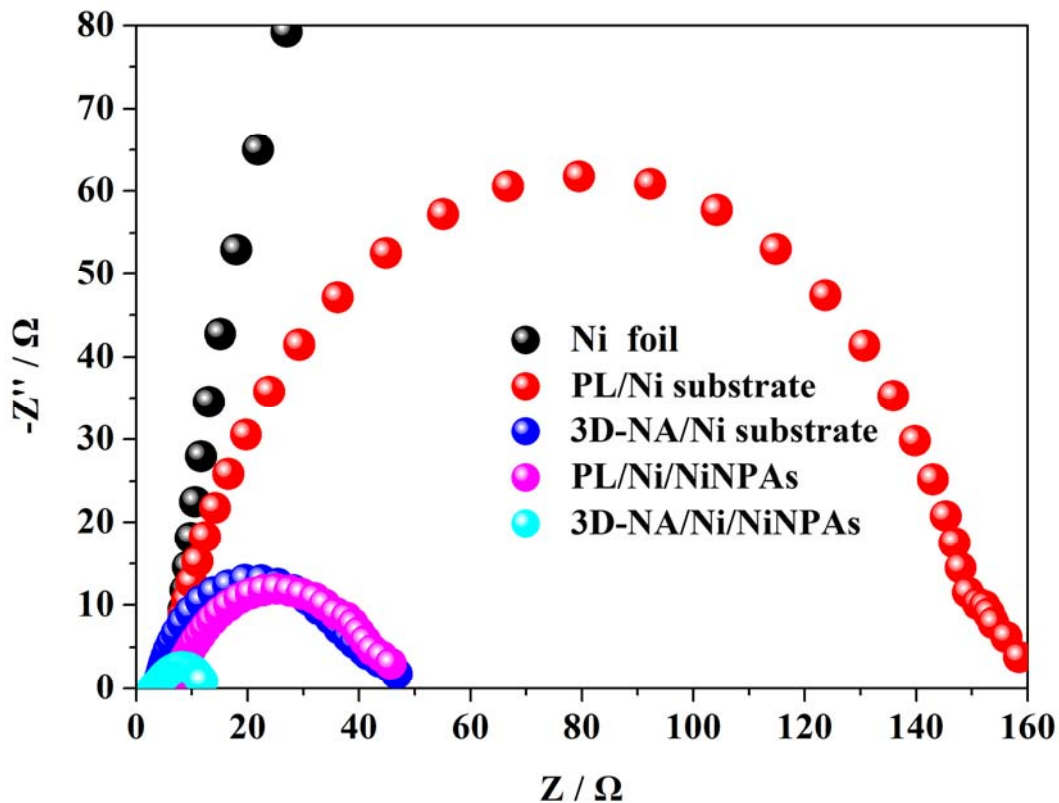

**Fig. S7** EIS of several electrodes at the applied potential of  $\sim 1.57$  V vs. RHE.

**Table S3.** The value of electron transfer resistance ( $R_{ct}$ ) for various electrodes in the of Fig. S7 based on the equivalent circuit diagram below.

| Work electrodes    | $R_{ct} / \Omega$ |
|--------------------|-------------------|
| Commercial Ni foil | 2218              |
| PL/Ni substrate    | 165.1             |
| 3D-NA substrate    | 32.65             |
| PL/Ni/NiNPs        | 39.55             |
| 3D-NA/Ni/NiNPs     | 11.68             |

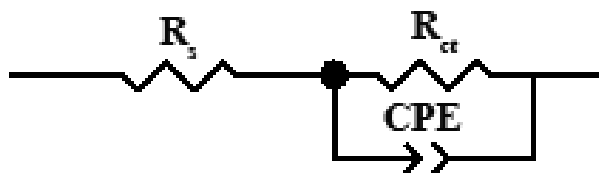

\* The corresponding equivalent circuit diagram consisting of a  $R_s$ , a  $R_{ct}$ , and a constant-phase element (CPE).

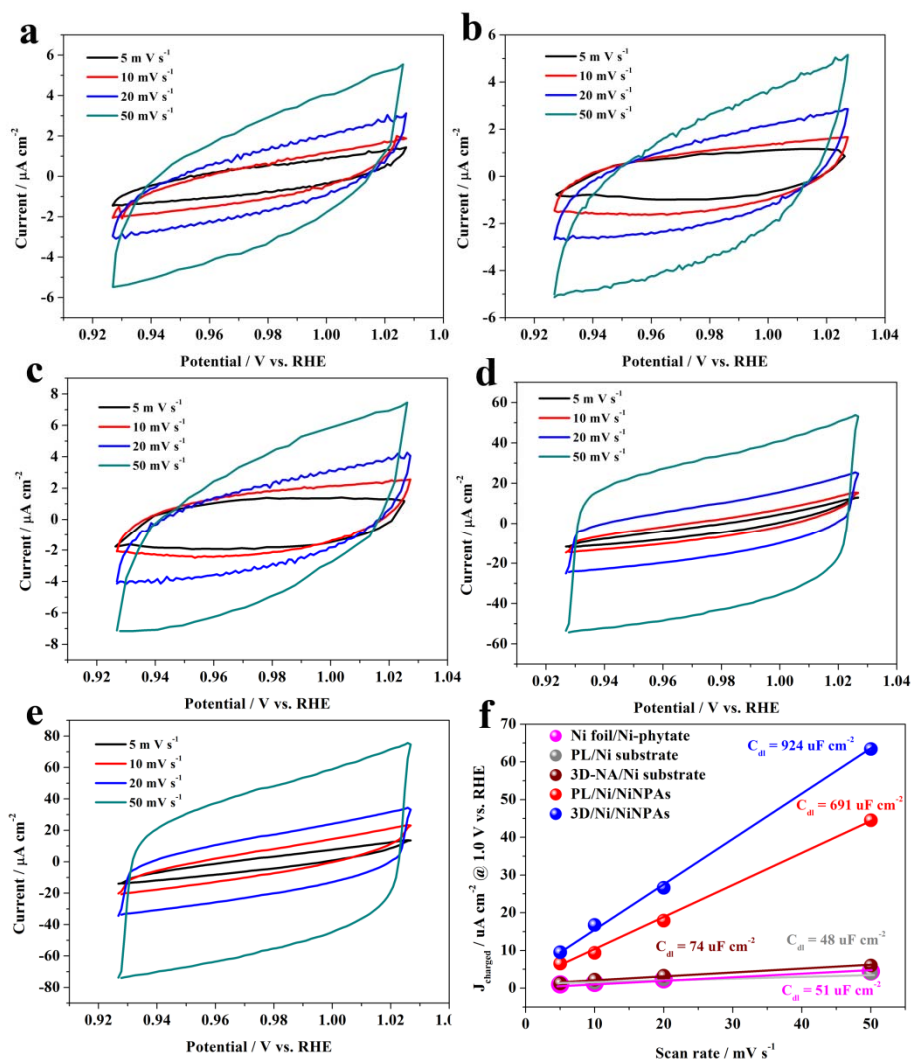

**Fig. S8** Electrochemical double-layer capacitance measurements of Ni foil/Ni-phytate (a), PL/Ni substrate (b), 3D-NA/Co substrate (c), PL/Ni/NiNPAs (d) and 3D-NA/Ni/NiNPAs (e) at the scan rates of 5, 10, 20 and 50  $\text{mV s}^{-1}$  in 1 M KOH; (f) linear fitting curves of the oxidation currents at 1.0 V (vs. RHE) of each electrode vs. scan rates.

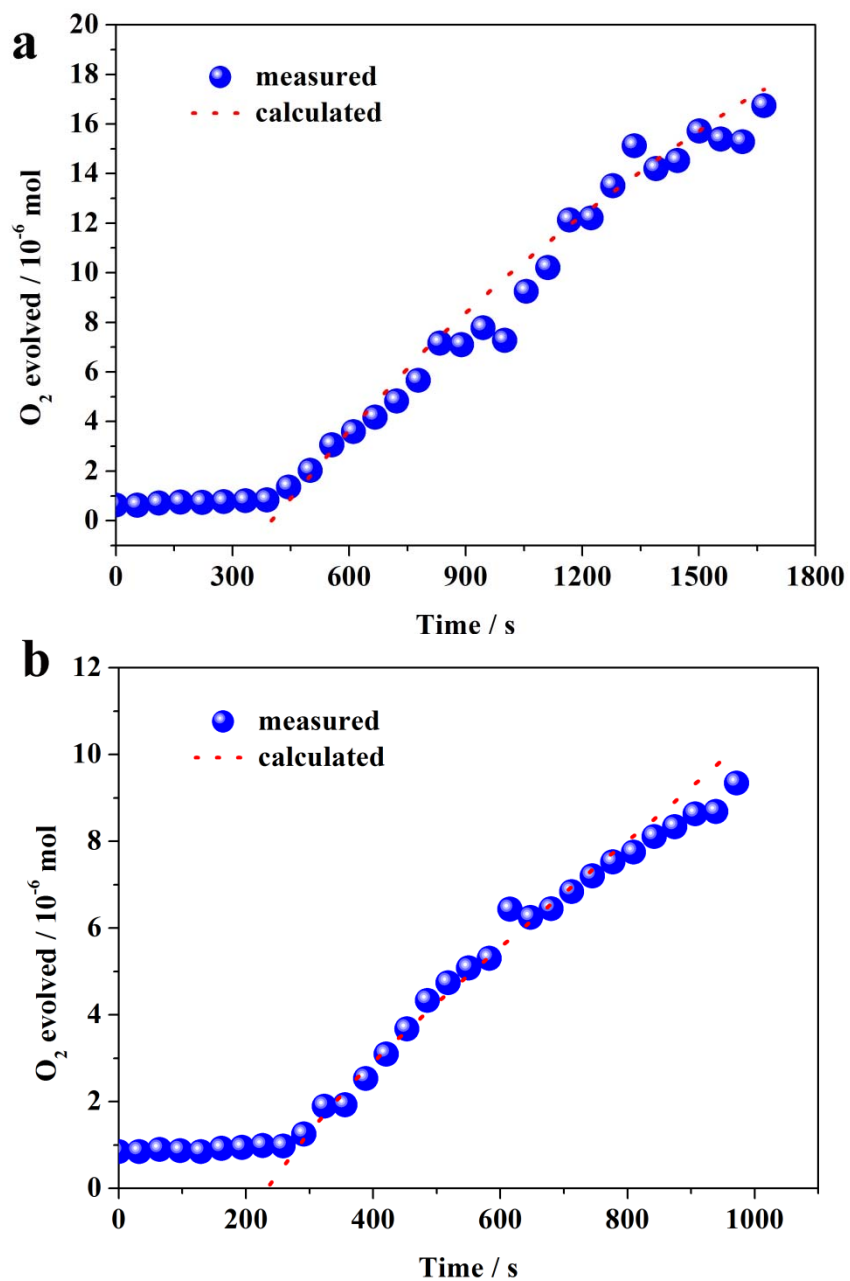

**Fig. S9** The Faradic efficiency testing of PL/Ni/NiNPs (a) and 3D-NA/Ni/NiNPs (b) in 1 M KOH. The spots are the actual oxygen production that obtained via PASCO oxygen sensor (USA) along with the Henry's law at a stable current of 4.8 mA for PL/Ni/NiNPs and 5.5 mA for 3D-NA/ Ni/NiNPs; the dot lines are the theoretical values.

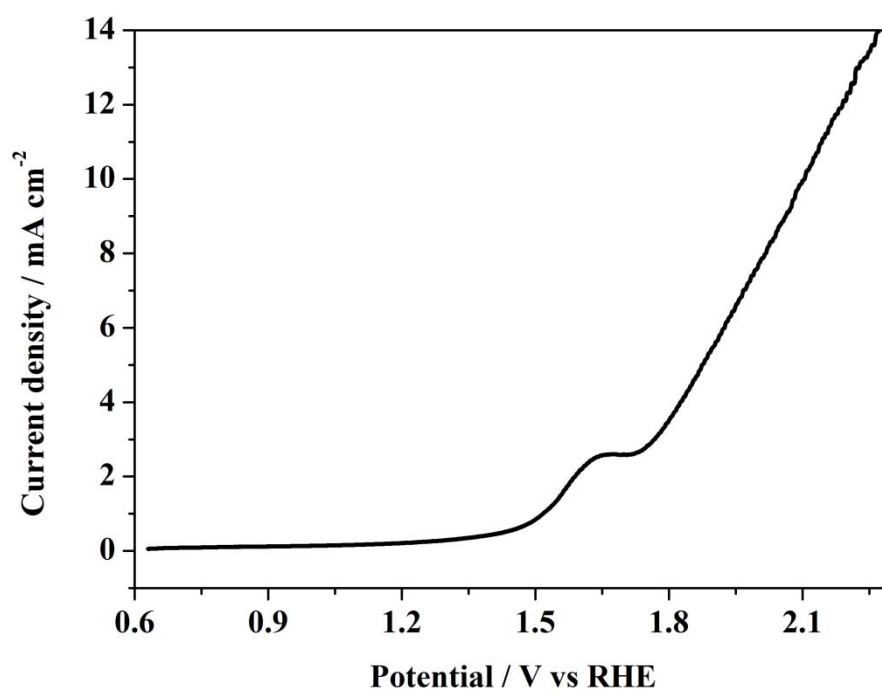

**Fig. S10** LSV measurement of 3D-NA/Ni/NiNPAs electrode with the scan rate of 5  $\text{mV s}^{-1}$  in 0.2 M borate buffer solution (pH = 9.2).

**Table S4** Comparison of OER performances of Ni-based electrocatalyst.

| Electrode and Experimental condition                                                                                     | Geometrical surface and loading                   | area | Onset Potenti al <sup>a</sup> /mV | $\eta^b$ @ 10 mA cm <sup>-2</sup> / mV | J @ $\eta = 0.32$ V mA cm <sup>-2</sup> | Stability                                                                                               | Ref. |
|--------------------------------------------------------------------------------------------------------------------------|---------------------------------------------------|------|-----------------------------------|----------------------------------------|-----------------------------------------|---------------------------------------------------------------------------------------------------------|------|
| Ni <sub>0.9</sub> Fe <sub>0.1</sub> /NC on glassy carbon, 1 M KOH                                                        | 0.196 cm <sup>2</sup> , 0.2 mg cm <sup>-2</sup>   | 0.2  | ~ 270                             | 330                                    | ~ 5                                     | An increase of 25 mV after 10000 cycles at 10 mA cm <sup>-2</sup>                                       | [1]  |
| MWCNTs/Ni(OH) <sub>2</sub> on ITO, 0.1 M KOH                                                                             | 0.28 mg cm <sup>-2</sup>                          |      | 322                               | 474                                    | ~ 1                                     | 100 % current density retention after 6 hours' electrocatalysis at $\eta = 0.435$ V                     | [2]  |
| FeNi@NC on glassy carbon, 1 M KOH                                                                                        | 0.196 cm <sup>2</sup> , 0.32 mg cm <sup>-2</sup>  | 0.32 | 210                               | 280                                    | 20                                      | A slight increase in potential after 10000 cycles at 100 mA cm <sup>-2</sup> and 40 mA cm <sup>-2</sup> | [3]  |
| Li <sub>1.03</sub> Ni <sub>0.66</sub> Co <sub>0.21</sub> F <sub>0.10</sub> O <sub>1.95</sub> on glassy carbon, 0.1 M KOH | 0.196 cm <sup>2</sup> , 0.128 mg cm <sup>-2</sup> |      | 283                               | 375                                    | ~ 1                                     | Onset potential remains the same after 60 minutes' electrocatalysis at 10 mA cm <sup>-2</sup>           | [4]  |
| $\alpha$ -Ni(OH) <sub>2</sub> spheres on glassy carbon, 0.1 M KOH                                                        | 0.196 cm <sup>2</sup> , 0.2 mg cm <sup>-2</sup>   | 0.2  | -                                 | 331                                    | < 10                                    | > 100 % current density retention after 330 minutes' electrocatalysis at $\eta = 340$ mV                | [5]  |
| Ni <sub>3</sub> S <sub>2</sub> Nanosheet grown on Ni foam, 1 M NaOH                                                      | 0.09 cm <sup>2</sup> , 1.6 mg cm <sup>-2</sup>    | 1.6  | ~ 120                             | 260                                    | ~ 25                                    | ~ 100 % current density retention after 200 hours' electrocatalysis at $\eta = 260$ mV                  | [6]  |
| CoNi(OH) <sub>x</sub> grown on Cu film, 1 M KOH                                                                          | 0.72 mg cm <sup>-2</sup>                          |      | 250                               | 280                                    | ~ 63                                    | 64% current density retention after 24 hours' electrocatalysis at $\eta = 320$ mV                       | [7]  |
| NiCo-LDH grown on carbon paper, 1 M KOH                                                                                  | 0.17 mg cm <sup>-2</sup>                          |      | -                                 | 367                                    | ~ 2                                     | An increase of 22 mV after 6 hours' electrocatalysis at 10 mA cm <sup>-2</sup>                          | [8]  |
| Ni NPs in N-doped graphene films, 0.1 M KOH                                                                              | 0.91 mg cm <sup>-2</sup>                          |      | -                                 | ~ 340                                  | ~ 8                                     | > 100 % current density retention after 12 hours' electrocatalysis at $\eta = 440$ mV                   | [9]  |
| Ni-Co oxide-HNSs grown on FTO, 1.0 M NaOH                                                                                | 0.25 cm <sup>2</sup>                              |      | 290                               | 340                                    | 5                                       | 96 % current density retention after 18 hours' electrocatalysis at $\eta = 370$ mV                      | [10] |

|                                                                      |                                                  |     |     |     |                                                                                             |           |
|----------------------------------------------------------------------|--------------------------------------------------|-----|-----|-----|---------------------------------------------------------------------------------------------|-----------|
| NiCo <sub>2</sub> O <sub>4</sub> nanowires grown on Ti foil, 1 M KOH | 0.3 mg cm <sup>-2</sup>                          | 330 | 370 | ~0  | ~93% current density retention after 20 hours' electrocatalysis at η = 420 mV               | [11]      |
| Fe <sub>6</sub> Ni <sub>10</sub> on glassy carbon, 1 M KOH           | 0.072 cm <sup>2</sup> , 0.10 mg cm <sup>-2</sup> | -   | 286 | 20  | -                                                                                           | [12]      |
| NiFe-NS on glassy carbon, 1 M KOH                                    | 0.071 cm <sup>2</sup> , 0.07 mg cm <sup>-2</sup> | 260 | 302 | 25  | An increase of 20 mV in potential after 6 hours' electrocatalysis at 10 mA cm <sup>-2</sup> | [13]      |
| Ni <sub>2</sub> P on glassy carbon, 1 M KOH                          | 0.071 cm <sup>2</sup> , 0.14 mg cm <sup>-2</sup> | -   | 290 | ~20 | An increase of 10 mV after 10 hours' electrocatalysis at 10 mA cm <sup>-2</sup>             | [14]      |
| 3D-NA/Ni/NiNPAs grown on Cu-coated polyimide film, 1 M KOH           | 0.25 cm <sup>2</sup> , 0.3 mg cm <sup>-2</sup>   | 220 | 285 | 25  | 94 % current density retention after 175 hours' electrocatalysis at η = 340 mV              | This work |
| 3D-NA/RuO <sub>2</sub> on Cu-coated polyimide film, 1 M KOH          | 0.25 cm <sup>2</sup> , 0.28 mg cm <sup>-2</sup>  | 210 | 310 | 13  | -                                                                                           | This work |

<sup>a</sup>the potential at which the reaction occurred; <sup>b</sup> η infers to overpotential.

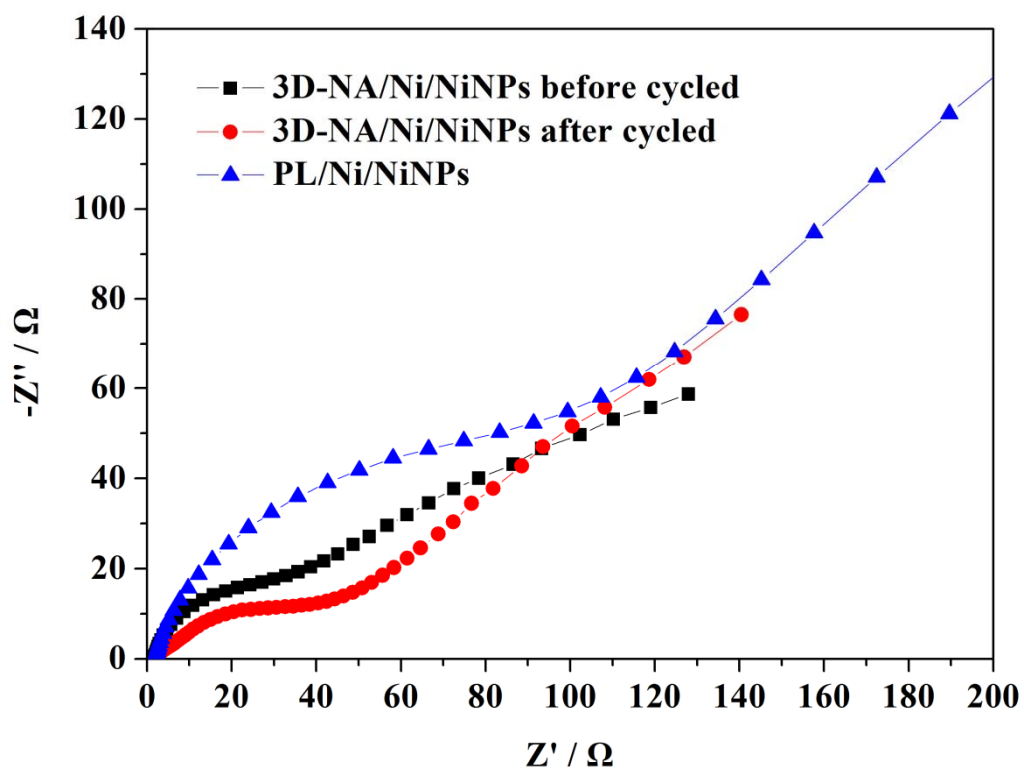

**Fig. S11** EIS of 3D-NA/Ni/NiNPAs before and after cycled as well as PL/Ni/NiNPAs electrodes at the open circuit potential.

**Table S5** Comparison of capacitance performances of Ni-based materials.

| Substrate                | Materials                                                                      | Specific capacitance at 2 mA cm <sup>-2</sup>     | Mass loading | Cycling performance                                          | Ref.      |
|--------------------------|--------------------------------------------------------------------------------|---------------------------------------------------|--------------|--------------------------------------------------------------|-----------|
| Ni foam                  | Ni-CNTs@β-Ni(OH) <sub>2</sub>                                                  | 1283 F g <sup>-1</sup>                            | 1-2 mg       | 95 % retention after 2000 cycles at 10 A g <sup>-1</sup>     | [15]      |
|                          | Co <sub>3</sub> O <sub>4</sub> @NiAl-LDH                                       | 1800 F g <sup>-1</sup>                            | 3.9 mg       | 87.9 % retention after 2000 cycles at 8 A g <sup>-1</sup>    | [16]      |
|                          | Ni-Co sulfide NWAs                                                             | ~ 2500 F g <sup>-1</sup>                          | 2.5 mg       | 78.5 % retention after 3000 cycles at 15 A cm <sup>-2</sup>  | [17]      |
|                          | NiO nanoarrays                                                                 | 2065 F g <sup>-1</sup>                            | 0.125 mg     | 88.9 % retention after 5000 cycles at 70 A g <sup>-1</sup>   | [18]      |
|                          | Ni <sub>2</sub> P NS/NF                                                        | ~ 3500 F g <sup>-1</sup>                          | 1.2 mg       | 72 % retention after 5000 cycles at 10 A g <sup>-1</sup>     | [19]      |
| Cu-coated polyimide film | 3D-NA/Ni/NiNP As                                                               | 3264 F g <sup>-1</sup><br>979 mF cm <sup>-2</sup> | 0.3 mg       | 88 % retention after 20000 cycles at 100 mA cm <sup>-2</sup> | This work |
| Flexible substrate       | NiCo <sub>2</sub> O <sub>4</sub> with P123 and EG on carbon cloth              | ~ 608 mF cm <sup>-2</sup>                         | 0.33 mg      | 90 % retention after 4000 cycles at 10 A g <sup>-1</sup>     | [20]      |
|                          | graphite/Ni/Co <sub>2</sub> NiO <sub>4</sub> -CP on cellulose paper            | 600 mF cm <sup>-2</sup>                           | 1.55 mg      | 98 % retention after 15000 cycles                            | [21]      |
|                          | Ni/Co-LDHs pressed on flexible Ni foam                                         | ~ 1000 mF cm <sup>-2</sup>                        | 0.5 - 0.8 mg | -                                                            | [22]      |
|                          | NiO/Ni(OH) <sub>2</sub> nanoflowers encapsulated in 3,4-ethylenedioxythiophene | 400 mF cm <sup>-2</sup> at 4 mA cm <sup>-2</sup>  | -            | 82.2 % retention after 1000 cycles at 4 mA cm <sup>-2</sup>  | [23]      |



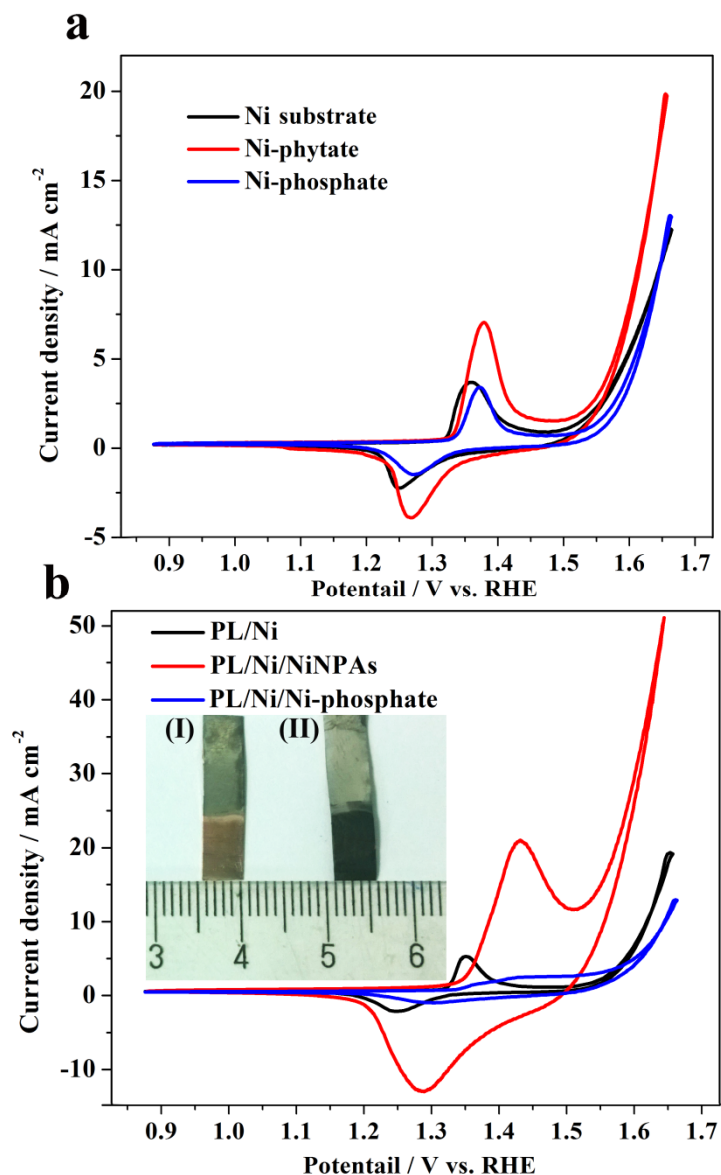

**Fig. S12** CVs of commercial Ni foil (a) and PL/Ni (b) with the treatment of 1M phytic acid for 13h and 1M phosphoric acid for 3h, respectively. The inset of Fig.S11b shows the photographs of PL/Ni immersed in phosphoric acid (I) and phytic acid (II).

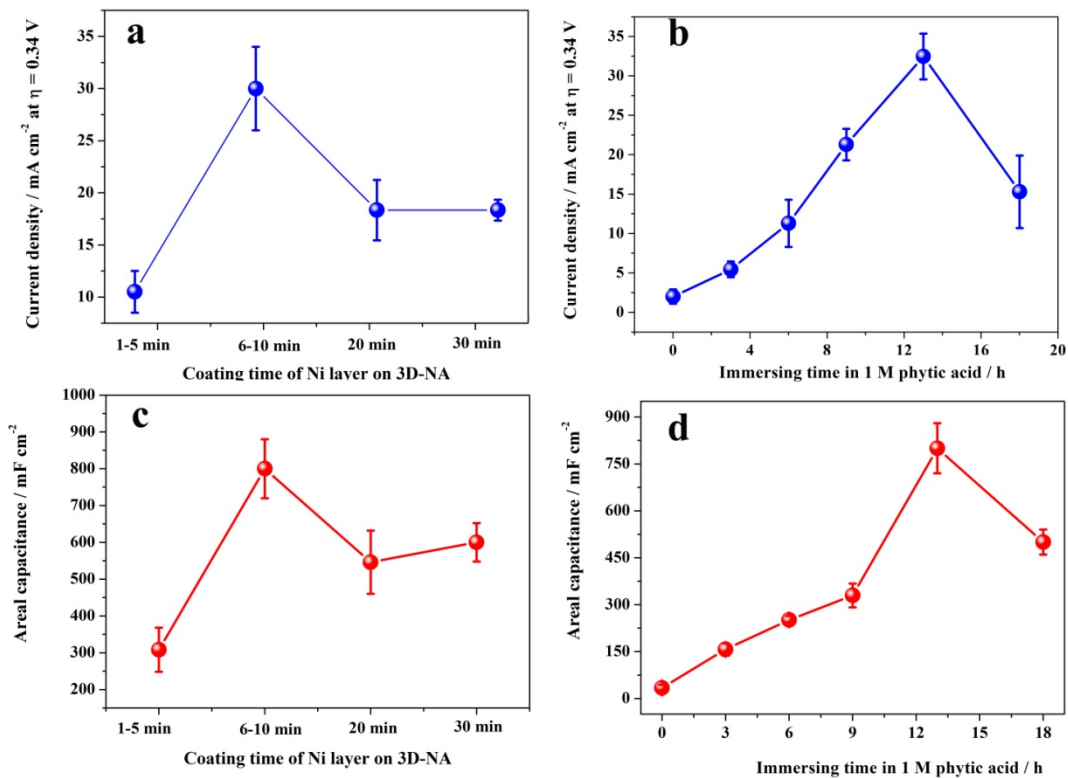

**Fig. S13** The investigations of coating time of Ni plating and immersing time in 1 M phytic acid for OER activities (a-b) and capacitive performance (c-d).

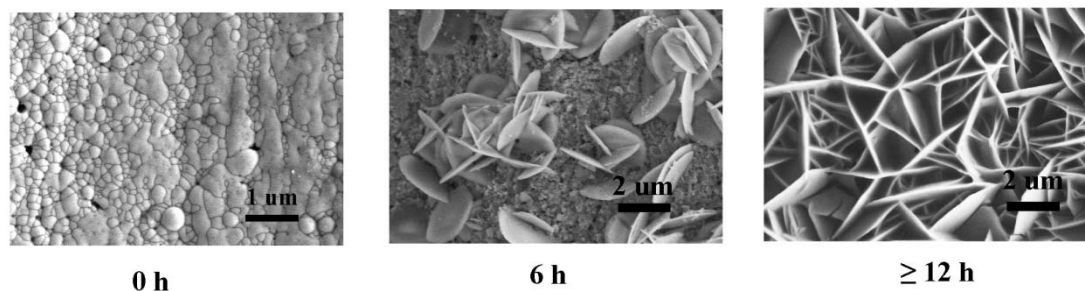

**Fig. S14** SEM images of PL/Ni/NiNPAs (coating for 7 min) with different immersing time in 1 M phytic acid.

**Table S6.** The active nickel plating mass and active materials mass of each electrode at the fixed conditions.

| Coating time investigation |                              |                                               | Immersing time investigation |                                              |
|----------------------------|------------------------------|-----------------------------------------------|------------------------------|----------------------------------------------|
| Coating time (min)         | $m_{Ni}^*$ ( $mg\ cm^{-2}$ ) | $m_a^*$ ( $mg\ cm^{-2}$ , immersing for 13 h) | Immersing time (h)           | $m_a^*$ ( $mg\ cm^{-2}$ , coating for 7 min) |
| 1-5 min                    | 0.72                         | 0.16                                          | 3 h                          | 0.81                                         |
| 6-10 min                   | 1.00                         | 0.30                                          | 6 h                          | 0.62                                         |
| 20 min                     | 1.76                         | 0.76                                          | 9 h                          | 0.37                                         |
| 30 min                     | 2.24                         | 1.24                                          | 13 h                         | 0.20                                         |
|                            |                              |                                               | 18 h                         | 0.09                                         |

\*the mass per square centimeter is obtained by the weight difference between the substrate (3D-NA or PL) and the electrode at the fixed condition and the final values are generally the average of 5 individual electrodes.

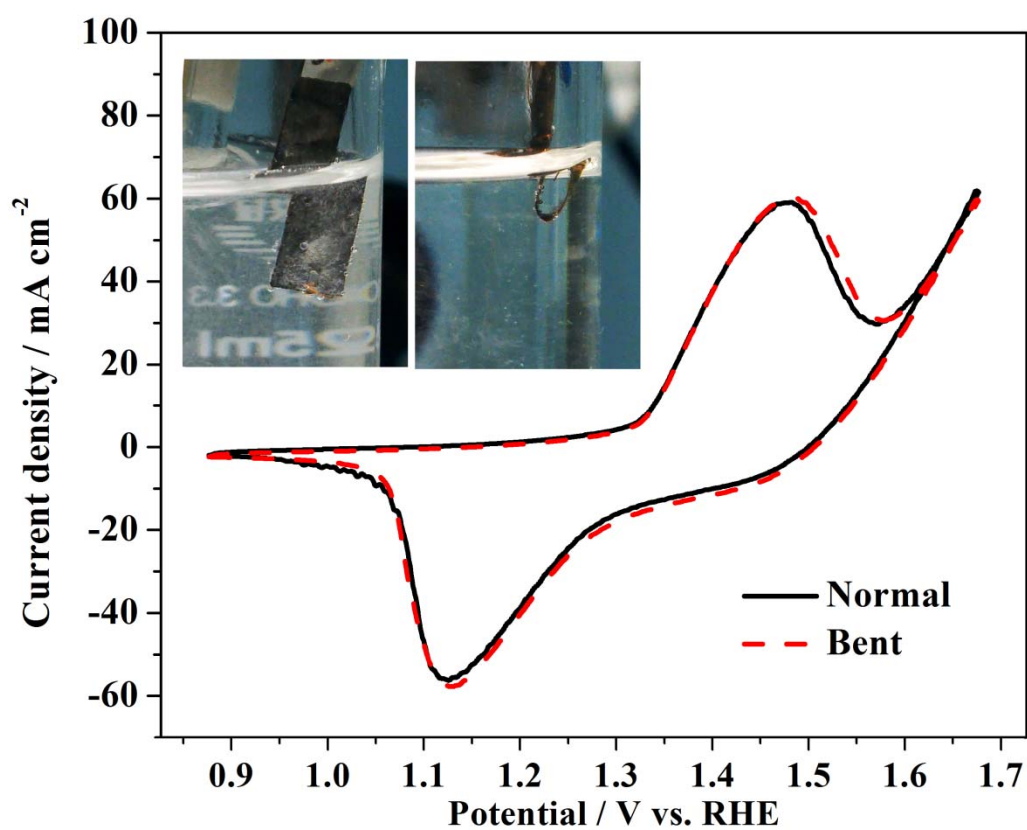

**Fig. S15** CVs of 3D-NA/Ni/NiNPAs electrode at two different conditions and the inset is the optical images of the electrode at the normal and bending state.

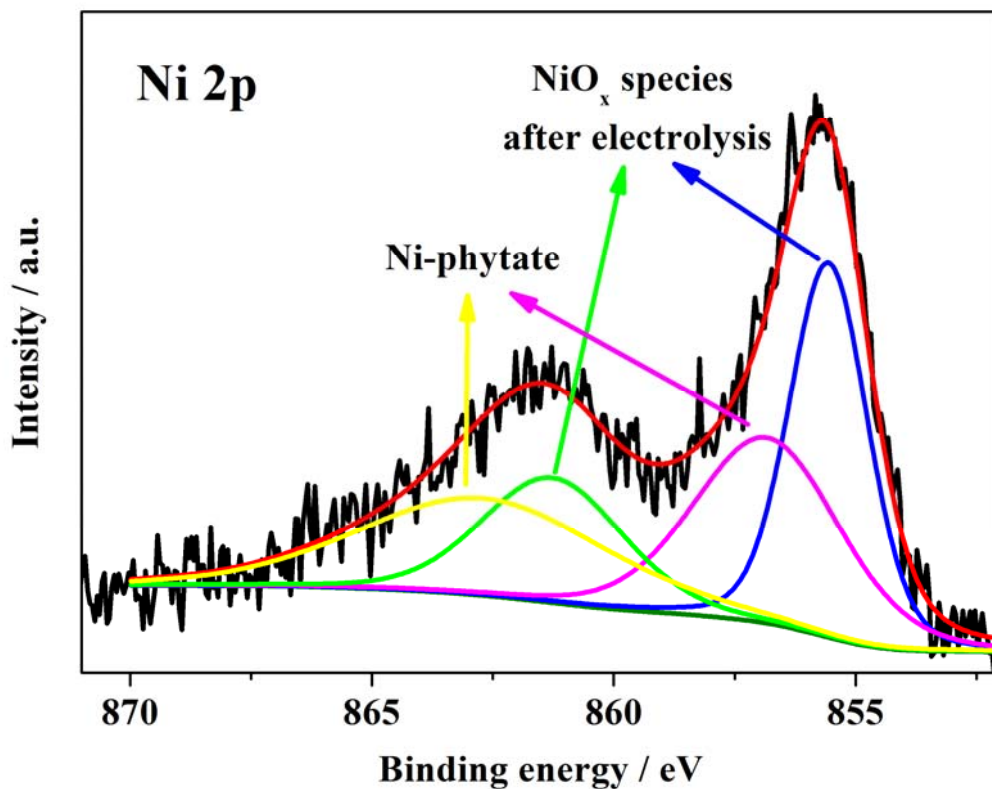

**Fig. S16** Ni 2p spectrum of 3D-NA/Ni/NiNPAs after electrolysis. Ni 2p spectrum of 3D-NA/Ni/NiNPAs after electrolysis has been deconvoluted into four peaks at 855.5 eV, 856.8 eV, 861.3 eV and 862.5 eV, assigned to NiO<sub>x</sub> species and Ni-phytate, respectively. The proportion of converted Ni-phytate could be calculated to be approximate 48 % according to the integrated area of each portion.

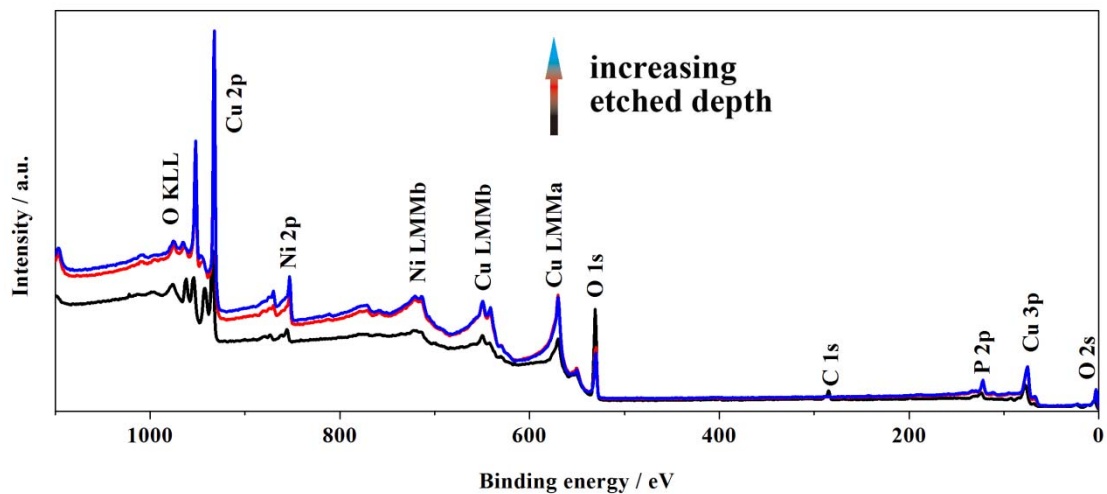

**Fig. S17** The survey scan depth-profiling XPS spectra of 3D-Ni/Ni/NiNPAs electrode after electrolysis.

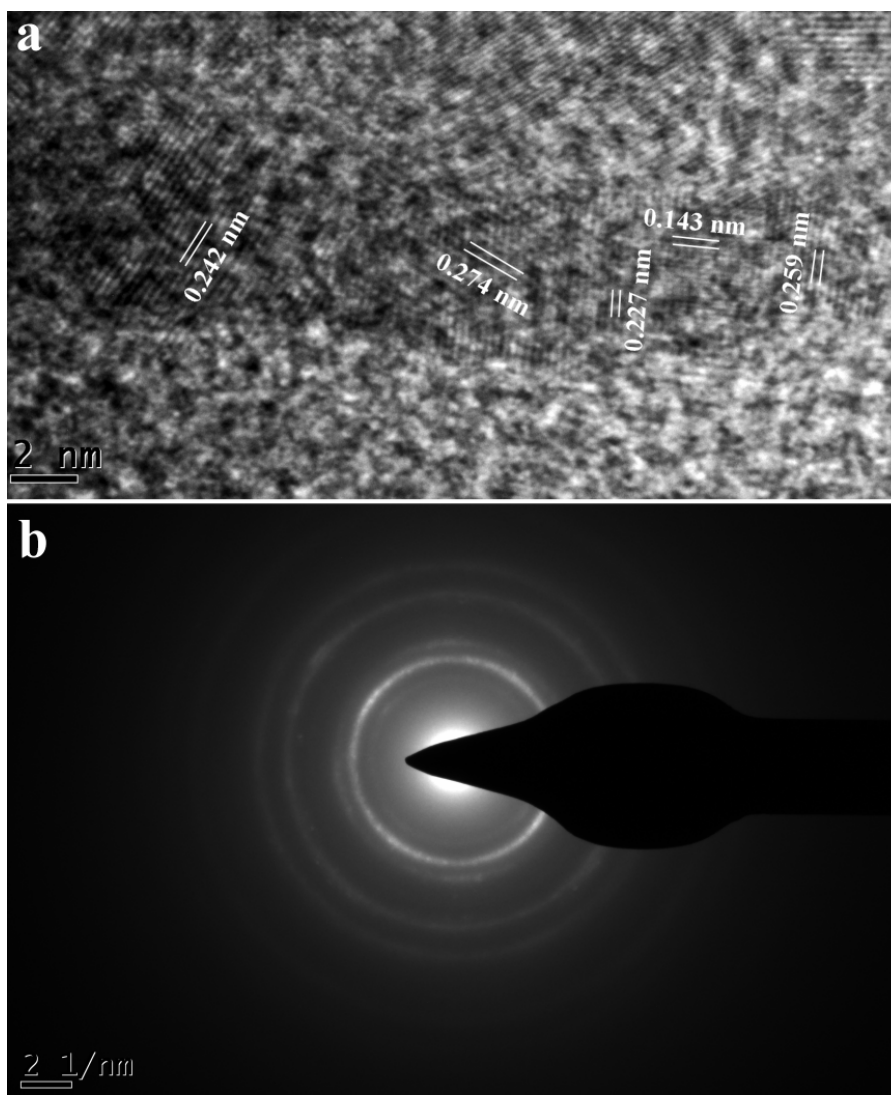

**Fig. S18** (a) TEM and the lattice fringes spacing (marked in white) of the nanofibers; (b) the SAED pattern of Ni-phytate nanoplates after catalysis.

### Reference:

- [1] X. Zhang, H.M. Xu, X.X. Li, Y.Y. Li, T.B. Yang, Y.Y. Liang, Facile Synthesis of Nickel-Iron/Nanocarbon Hybrids as Advanced Electrocatalysts for Efficient Water Splitting. *ACS Catal.* **2016**, *6*, 580.
- [2] X.M. Zhou, Z.M. Xia, Z.Y. Zhang, Y.Y. Ma, Y.Q. Qu, One-step synthesis of multi-walled carbon nanotubes/ultra-thin Ni(OH)<sub>2</sub> nanoplate composite as efficient catalysts for water oxidation. *J. Mater. Chem. A* **2014**, *2*, 11799.
- [3] X.J. Cui, P.J. Ren, D.H. Deng, J. Deng, X.H. Bao, Single layer graphene encapsulating non-precious metals as high-performance electrocatalysts for water oxidation. *Energy Environ. Sci.* **2016**, *9*, 123.
- [4] V. Augustyn, S. Therese, T.C. Turner, A. Manthiram, Nickel-rich layered LiNi<sub>1-x</sub>M<sub>x</sub>O<sub>2</sub> (M = Mn, Fe, and Co) electrocatalysts with high oxygen evolution reaction activity. *J. Mater. Chem. A* **2015**, *3*, 16604.
- [5] M. Gao, W. Sheng, Z. Zhuang, Q. Fang, S. Gu, J. Jiang, Y. Yan, Efficient Water Oxidation Using

- Nanostructured  $\alpha$ -Nickel-Hydroxide as an Electrocatalyst. *J. Am. Chem. Soc.* **2014**, *136*, 7077.
- [6] L.L. Feng, G.T. Yu, Y.Y. Wu, G.D. Li, H. Li, Y.H. Sun, T. Asefa, W. Chen, X.X. Zou, High-Index Faceted Ni<sub>3</sub>S<sub>2</sub> Nanosheet Arrays as Highly Active and Ultrastable Electrocatalysts for Water Splitting. *J. Am. Chem. Soc.* **2015**, *137*, 14023.
- [7] S.W. Li, Y.C. Wang, S.J. Peng, L.J. Zhang, A.M. Al-Enizi, H. Zhang, X.H. Sun, G.F. Zheng, Co-Ni-Based Nanotubes/Nanosheets as Efficient Water Splitting Electrocatalysts. *Advanced Energy Materials* **2016**, *6*.
- [8] H.F. Liang, F. Meng, M. Caban-Acevedo, L.S. Li, A. Forticaux, L.C. Xiu, Z.C. Wang, S. Jin, Hydrothermal Continuous Flow Synthesis and Exfoliation of NiCo Layered Double Hydroxide Nanosheets for Enhanced Oxygen Evolution Catalysis. *Nano Lett.* **2015**, *15*, 1421.
- [9] S. Chen, J.J. Duan, J.R. Ran, M. Jaroniec, S.Z. Qiao, N-doped graphene film-confined nickel nanoparticles as a highly efficient three-dimensional oxygen evolution electrocatalyst. *Energy Environ. Sci.* **2013**, *6*, 3693.
- [10] H.Y. Wang, Y.Y. Hsu, R. Chen, T.S. Chan, H.M. Chen, B. Liu, Ni<sup>3+</sup>-Induced Formation of Active NiOOH on the Spinel Ni-Co Oxide Surface for Efficient Oxygen Evolution Reaction. *Advanced Energy Materials* **2015**, *5*.
- [11] Z. Peng, D.S. Jia, A.M. Al-Enizi, A.A. Elzatahry, G.F. Zheng, From Water Oxidation to Reduction: Homologous Ni-Co Based Nanowires as Complementary Water Splitting Electrocatalysts. *Advanced Energy Materials* **2015**, *5*.
- [12] L. Kuai, J. Geng, C. Chen, E. Kan, Y. Liu, Q. Wang, B. Geng, A Reliable Aerosol-Spray-Assisted Approach to Produce and Optimize Amorphous Metal Oxide Catalysts for Electrochemical Water Splitting. *Angew. Chem. Int. Ed.* **2014**, *53*, 7547.
- [13] F. Song, X.L. Hu, Exfoliation of layered double hydroxides for enhanced oxygen evolution catalysis. *Nature Communications* **2014**, *5*.
- [14] L.A. Stern, L.G. Feng, F. Song, X.L. Hu, Ni<sub>2</sub>P as a Janus catalyst for water splitting: the oxygen evolution activity of Ni<sub>2</sub>P nanoparticles. *Energy Environ. Sci.* **2015**, *8*, 2347.
- [15] X. Ma, Y. Li, Z. Wen, F. Gao, C. Liang, R. Che, Ultrathin  $\beta$ -Ni(OH)<sub>2</sub> Nanoplates Vertically Grown on Nickel-Coated Carbon Nanotubes as High-Performance Pseudocapacitor Electrode Materials. *ACS Appl. Mat. Interfaces* **2015**, *7*, 974.
- [16] F. Ning, M. Shao, C. Zhang, S. Xu, M. Wei, X. Duan, Co<sub>3</sub>O<sub>4</sub>@layered double hydroxide core/shell hierarchical nanowire arrays for enhanced supercapacitance performance. *Nano Energy* **2014**, *7*, 134.
- [17] Y. Li, L. Cao, L. Qiao, M. Zhou, Y. Yang, P. Xiao, Y. Zhang, Ni-Co sulfide nanowires on nickel foam with ultrahigh capacitance for asymmetric supercapacitors. *J. Mater. Chem. A* **2014**, *2*, 6540.
- [18] V. Senthilkumar, F.B. Kadumudi, N.T. Ho, J.W. Kim, S. Park, J.S. Bae, W.M. Choi, S. Cho, Y.S. Kim, NiO nanoarrays of a few atoms thickness on 3D nickel network for enhanced pseudocapacitive electrode applications. *J. Power Sources* **2016**, *303*, 363.
- [19] K. Zhou, W. Zhou, L. Yang, J. Lu, S. Cheng, W. Mai, Z. Tang, L. Li, S. Chen, Ultrahigh-Performance Pseudocapacitor Electrodes Based on Transition Metal Phosphide Nanosheets Array via Phosphorization: A General and Effective Approach. *Adv. Funct. Mater.* **2015**, *25*, 7530.
- [20] S. Gao, F. Liao, S. Ma, L. Zhu, M. Shao, Network-like mesoporous NiCo<sub>2</sub>O<sub>4</sub> grown on carbon cloth for high-performance pseudocapacitors. *J. Mater. Chem. A* **2015**, *3*, 16520.
- [21] J.X. Feng, S.H. Ye, A.L. Wang, X.F. Lu, Y.X. Tong, G.R. Li, Flexible Cellulose Paper-based Asymmetrical Thin Film Supercapacitors with High-Performance for Electrochemical Energy Storage. *Adv. Funct. Mater.* **2014**, *24*, 7093.



[22] T. Li, G.H. Li, L.H. Li, L. Liu, Y. Xu, H.Y. Ding, T. Zhang, Large-Scale Self-Assembly of 3D Flower-like Hierarchical Ni/Co-LDHs Microspheres for High-Performance Flexible Asymmetric Supercapacitors. *ACS Appl. Mat. Interfaces* **2016**, *8*, 2562.

[23] H.L. Yang, H.H. Xu, M. Li, L. Zhang, Y.H. Huang, X.L. Hu, Assembly of NiO/Ni(OH)<sub>2</sub>/PEDOT Nanocomposites on Contra Wires for Fiber-Shaped Flexible Asymmetric Supercapacitors. *ACS Appl. Mat. Interfaces* **2016**, *8*, 1774.
